# Supplementary material for: Identification and Quantification of Microplastics in Effluents of Wastewater Treatment Plant by Differential Scanning Calorimetry (DSC)
Source: MDPI journal article supplement (doi:10.3390/su14094920), 2022-04-20
Supplement: s1 [file s1]

**Table S1.** Statistics of the peaks recorded in the DSC.

| Plant     | Week | Sample | Melting point (°C) |           |       |       |                |           |       |       |                |           |       |       |                |           |       |       |
|-----------|------|--------|--------------------|-----------|-------|-------|----------------|-----------|-------|-------|----------------|-----------|-------|-------|----------------|-----------|-------|-------|
|           |      |        | Peak 1             |           |       |       | Peak 2         |           |       |       | Peak 3         |           |       |       | Peak 4         |           |       |       |
|           |      |        | n <sub>i</sub>     | $\bar{X}$ | SD    | SE    | n <sub>i</sub> | $\bar{X}$ | SD    | SE    | n <sub>i</sub> | $\bar{X}$ | SD    | SE    | n <sub>i</sub> | $\bar{X}$ | SD    | SE    |
| WWTP<br>1 | 1    | 1      | 96.7               |           |       |       | 110            |           |       |       | 161            |           |       |       | 248.2          |           |       |       |
|           |      | 2      | 96.9               |           |       |       | 109.6          |           |       |       | 161.3          |           |       |       | 248            |           |       |       |
|           |      | 3      | 96.5               | 96.72     | 0.179 | 0.080 | 109.8          | 109.74    | 0.358 | 0.160 | 160.9          | 161.12    | 0.179 | 0.080 | 247.8          | 248.02    | 0.148 | 0.066 |
|           |      | 4      | 96.9               |           |       |       | 109.2          |           |       |       | 161.1          |           |       |       | 248.1          |           |       |       |
|           |      | 5      | 96.6               |           |       |       | 110.1          |           |       |       | 161.3          |           |       |       | 248            |           |       |       |
|           | 2    | 1      | 97                 |           |       |       | 109.9          |           |       |       | 161.2          |           |       |       | 247.9          |           |       |       |
|           |      | 2      | 96.5               |           |       |       | 109.9          |           |       |       | 161            |           |       |       | 248            |           |       |       |
|           |      | 3      | 96.8               | 96.7      | 0.212 | 0.095 | 110            | 109.92    | 0.084 | 0.037 | 161            | 161.2     | 0.212 | 0.095 | 248            | 248.02    | 0.164 | 0.073 |
|           |      | 4      | 96.7               |           |       |       | 109.8          |           |       |       | 161.5          |           |       |       | 247.9          |           |       |       |
|           |      | 5      | 96.5               |           |       |       | 110            |           |       |       | 161.3          |           |       |       | 248.3          |           |       |       |
|           | 3    | 1      | 96.6               |           |       |       | 110.1          |           |       |       | 160.9          |           |       |       | 248            |           |       |       |
|           |      | 2      | 96.6               |           |       |       | 110            |           |       |       | 161            |           |       |       | 247.9          |           |       |       |
|           |      | 3      | 96.9               | 96.64     | 0.182 | 0.081 | 109.9          | 109.88    | 0.192 | 0.086 | 161.3          | 161.1     | 0.187 | 0.084 | 247.8          | 247.94    | 0.089 | 0.04  |
|           |      | 4      | 96.7               |           |       |       | 109.8          |           |       |       | 161.3          |           |       |       | 248            |           |       |       |
|           |      | 5      | 96.4               |           |       |       | 109.6          |           |       |       | 161            |           |       |       | 248            |           |       |       |
| WWTP<br>2 | 1    | 1      |                    |           |       |       | 110            |           |       |       | 161            |           |       |       | 248.2          |           |       |       |
|           |      | 2      |                    |           |       |       | 109.6          |           |       |       | 161.3          |           |       |       | 248.2          |           |       |       |
|           |      | 3      |                    |           | -     |       | 109.8          | 109.9     | 0.200 | 0.089 | 160.8          | 161.04    | 0.182 | 0.081 | 247.8          | 248.04    | 0.182 | 0.081 |
|           |      | 4      |                    |           |       |       | 110            |           |       |       | 161            |           |       |       | 248.1          |           |       |       |
|           |      | 5      |                    |           |       |       | 110.1          |           |       |       | 161.1          |           |       |       | 247.9          |           |       |       |
|           | 2    | 1      |                    |           |       |       | 109.9          |           |       |       | 160.8          |           |       |       | 247.9          |           |       |       |
|           |      | 2      |                    |           |       |       | 110            |           |       |       | 160.9          |           |       |       | 247.9          |           |       |       |
|           |      | 3      |                    |           | -     |       | 109.6          | 109.84    | 0.152 | 0.068 | 161            | 161       | 0.187 | 0.084 | 248            | 248.02    | 0.164 | 0.073 |
|           |      | 4      |                    |           |       |       | 109.9          |           |       |       | 161            |           |       |       | 248            |           |       |       |
|           |      | 5      |                    |           |       |       | 109.8          |           |       |       | 161.3          |           |       |       | 248.3          |           |       |       |
|           | 3    | 1      |                    |           |       |       | 110.1          |           |       |       | 160.9          |           |       |       | 248.5          |           |       |       |
|           |      | 2      |                    |           |       |       | 110            |           |       |       | 160.9          |           |       |       | 248            |           |       |       |
|           |      | 3      |                    |           | -     |       | 109.5          | 109.8     | 0.245 | 0.110 | 161            | 161.02    | 0.130 | 0.058 | 247.9          | 248.16    | 0.241 | 0.108 |
|           |      | 4      |                    |           |       |       | 109.7          |           |       |       | 161.2          |           |       |       | 248.3          |           |       |       |
|           |      | 5      |                    |           |       |       | 109.7          |           |       |       | 161.1          |           |       |       | 248.1          |           |       |       |
| WWTP<br>3 | 1    | 1      | 96.6               |           |       |       | 110            |           |       |       | 161.3          |           |       |       | 248.2          |           |       |       |
|           |      | 2      | 96.9               |           |       |       | 110.5          |           |       |       | 161.3          |           |       |       | 247.8          |           |       |       |
|           |      | 3      | 96.8               | 96.78     | 0.130 | 0.080 | 109.8          | 109.94    | 0.488 | 0.218 | 160.8          | 161.12    | 0.205 | 0.092 | 248.5          | 248.1     | 0.274 | 0.122 |
|           |      | 4      | 96.9               |           |       |       | 109.2          |           |       |       | 161.1          |           |       |       | 248.1          |           |       |       |
|           |      | 5      | 96.7               |           |       |       | 110.2          |           |       |       | 161.1          |           |       |       | 247.9          |           |       |       |
|           | 2    | 1      | 97                 |           |       |       | 110.5          |           |       |       | 161.2          |           |       |       | 247.8          |           |       |       |
|           |      | 2      | 96.5               |           |       |       | 110            |           |       |       | 161.1          |           |       |       | 248            |           |       |       |
|           |      | 3      | 96.8               | 96.76     | 0.251 | 0.095 | 110.3          | 110.12    | 0.268 | 0.120 | 160.9          | 161       | 0.158 | 0.071 | 248.4          | 248.04    | 0.230 | 0.103 |
|           |      | 4      | 97                 |           |       |       | 109.9          |           |       |       | 161            |           |       |       | 248.1          |           |       |       |
|           |      | 5      | 96.5               |           |       |       | 109.9          |           |       |       | 160.8          |           |       |       | 247.9          |           |       |       |
|           | 3    | 1      | 96.6               |           |       |       | 109.8          |           |       |       | 161            |           |       |       | 247.8          |           |       |       |
|           |      | 2      | 97                 |           |       |       | 109.2          |           |       |       | 161            |           |       |       | 247.8          |           |       |       |
|           |      | 3      | 96.9               | 96.8      | 0.158 | 0.081 | 110            | 109.8     | 0.374 | 0.167 | 160.7          | 160.98    | 0.217 | 0.097 | 248.3          | 247.98    | 0.217 | 0.097 |
|           |      | 4      | 96.7               |           |       |       | 110.2          |           |       |       | 160.9          |           |       |       | 247.9          |           |       |       |
|           |      | 5      | 96.8               |           |       |       | 109.8          |           |       |       | 161.3          |           |       |       | 248.1          |           |       |       |
